# Supplementary material for: Compound identification in GC-MS by simultaneously evaluating the mass spectrum and retention index
Source: Royal Society of Chemistry journal article supplement (doi:10.1039/c3an02171h), 2014-01-01
Supplement: c3an02171h1.pdf [file c3an02171h1.pdf]

## Compound identification in GC-MS by simultaneously evaluating mass spectrum and retention index

Xiaoli Wei<sup>a</sup> Imhoi Koo<sup>a</sup> Seongho Kim<sup>b</sup> and Xiang Zhang,<sup>a</sup>

<sup>a</sup> Department of Chemistry, University of Louisville, Louisville, KY 40292, United States

<sup>b</sup> Biostatistics Core, Karmanos Cancer Institute, Wayne State University School of Medicine, Detroit, MI 48201, United States

**Table S1.** Results of the five times of 5-fold cross validation for analysis of the query dataset containing retention indices acquired on standard non-polar column. Each datum is the average of the results of a 5-fold cross validation with its standard deviation.

|                    | CV 1      | CV 2      | CV 3      | CV 4      | CV 5      |
|--------------------|-----------|-----------|-----------|-----------|-----------|
| a                  | 0.05±0.02 | 0.05±0.03 | 0.06±0.03 | 0.04±0.03 | 0.04±0.03 |
| b                  | 23±6      | 25±8      | 23±7      | 21±8      | 24±6      |
| w                  | 0.66±0.02 | 0.71±0.08 | 0.64±0.08 | 0.69±0.04 | 0.67±0.03 |
| Training error (%) | 11.5±0.1  | 11.5±0.2  | 11.4±0.3  | 11.4±0.2  | 11.5±0.4  |
| Testing error (%)  | 11.8±0.4  | 11.9±0.8  | 11.9±0.9  | 11.9±0.7  | 12.0±1.8  |

**Table S2.** Results of the five times of 5-fold cross validation for analysis of the query dataset containing retention indices acquired on standard polar column. Each datum is the average of the results of a 5-fold cross validation with its standard deviation.

|                    | CV 1      | CV 2      | CV 3      | CV 4      | CV 5      |
|--------------------|-----------|-----------|-----------|-----------|-----------|
| a                  | 0.02±0.01 | 0.02±0.01 | 0.03±0.02 | 0.02±0.01 | 0.01±0.01 |
| b                  | 26±7      | 32±3      | 26±6      | 29±1      | 26±7      |
| w                  | 0.72±0.07 | 0.67±0.07 | 0.73±0.13 | 0.73±0.09 | 0.75±0.05 |
| Training error (%) | 13.7±0.2  | 13.7±0.5  | 13.7±0.5  | 13.7±0.6  | 13.7±0.2  |
| Testing error (%)  | 14.3±1.0  | 14.1±2.0  | 14.3±1.8  | 14.3±2.3  | 14.4±1.4  |
